# Supplementary material for: Cadmium isotopes analysis of environmental samples with high organic matter by dry ashing method under wet plasma conditions
Source: Royal Society of Chemistry journal article supplement (doi:10.1039/d4ja00083h), 2024-01-01
Supplement: d4ja00083h1.pdf [file d4ja00083h1.pdf]

**Supporting Information for**

**Cadmium Isotopes Analysis of Environmental Samples with**

**High Organic Matter by Dry Ashing Method under Wet**

**Plasma Conditions**

Xian Wu<sup>1,2</sup>, Zeyu Wang<sup>1,3</sup>, Guangyi Sun<sup>1,\*</sup>, Yu Lin<sup>1,2</sup>, Xuewu Fu<sup>1,\*</sup>, Yang Tang<sup>1</sup>, Xinbin Feng<sup>1</sup>,

<sup>2</sup>

<sup>1</sup> State Key Laboratory of Environmental Geochemistry, Institute of Geochemistry, Chinese Academy of Sciences, Guiyang 550081, China

<sup>2</sup> University of Chinese Academy of Sciences, Beijing 100049, China

<sup>3</sup> College of Eco-Environmental Engineering, Guizhou Minzu University, Guiyang, Guizhou 550025, China

\* Corresponding authors: Guangyi Sun ([sunguangyi@mail.gyig.ac.cn](mailto:sunguangyi@mail.gyig.ac.cn)) and Xuewu Fu ([fuxuewu@mail.gyig.ac.cn](mailto:fuxuewu@mail.gyig.ac.cn))

**This supporting information includes 3 equations, 5 figures and 2 tables.**

Chemical reaction equations(S1-S3). Possible reactions of Cd compounds during dry ashing

Figure S1. Schematic diagram of dry ashing heating procedure

Figure S2. Relationship between  $\Delta\text{Cd}$  and Zr content. ( $\Delta\text{Cd}$  is the difference value between the Cd content measured by ICP-MS and GF-AAS, respectively.)

Figure S3. Comparison photo of non-dry-ashed sample and dry ashed sample(Left: non-dry-ashed sample, right: dry ashed sample ;take GSD-11 as an example)

Figure S4. Box plot of purification recovery distribution for dry-ashed standard samples

Figure S5. Comparison of Cd isotopic compositions of dry-ashed samples with different purification recovery ranges, reference values: GSS-5 from Peng *et al.* (2021)<sup>1</sup>; GSD-12 from Lu *et al.* (2021)<sup>2</sup>; NIST SRM 2711a and GSS-4 from Tan *et al.* (2020)<sup>3</sup>; BCR-482 from Borovička *et al.* (2020)<sup>4</sup>

Table S1. The reference material information

Table S2. Trace elements in QMA filter membranes and sediments

**Chemical reaction equations(S1-3). Possible reactions of Cd compounds during  
dry ashing**

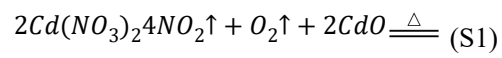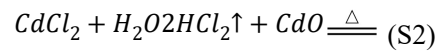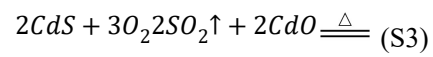

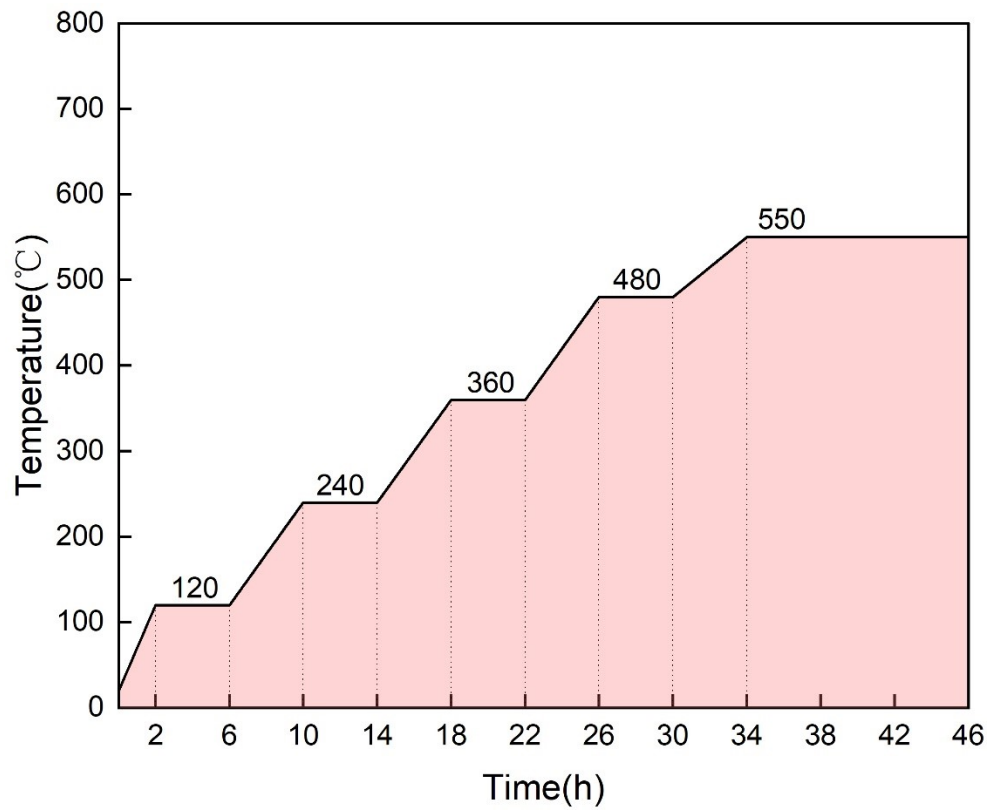

**Figure S1. Schematic diagram of dry ashing heating procedure**

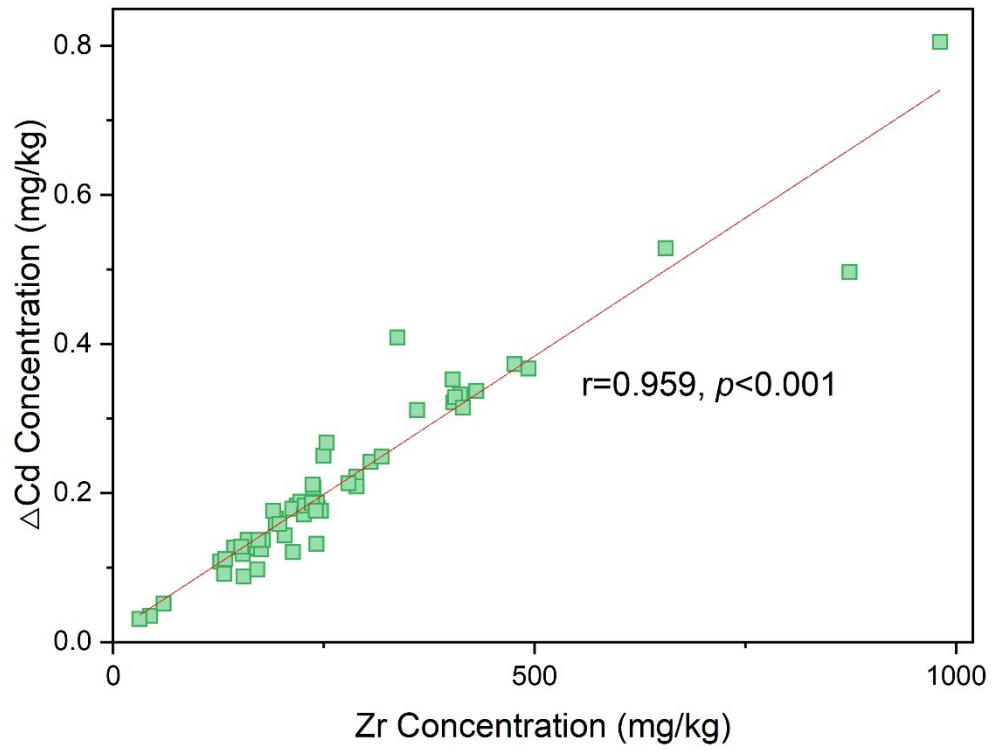

**Figure S2. Relationship between  $\Delta$ Cd and Zr Content. ( $\Delta$ Cd is the difference value between the Cd content measured by ICP-MS and GF-AAS, respectively.).**

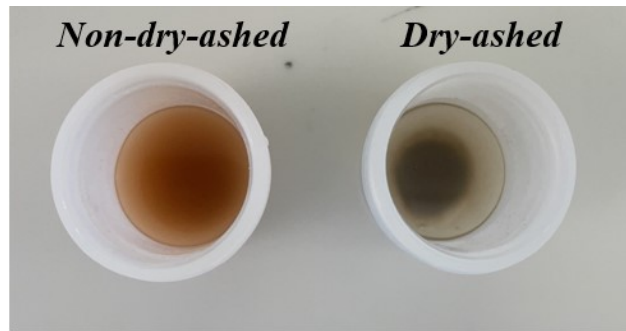

***Primary stage***

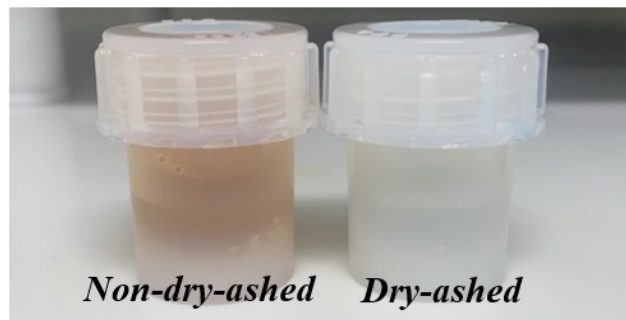

***Resolution stage***

**Figure S3. Comparison photo of non-dry-ashed sample and dry ashed sample(Left: non-dry-ashed sample, right: dry ashed sample ;take GSD-11 as an example)**

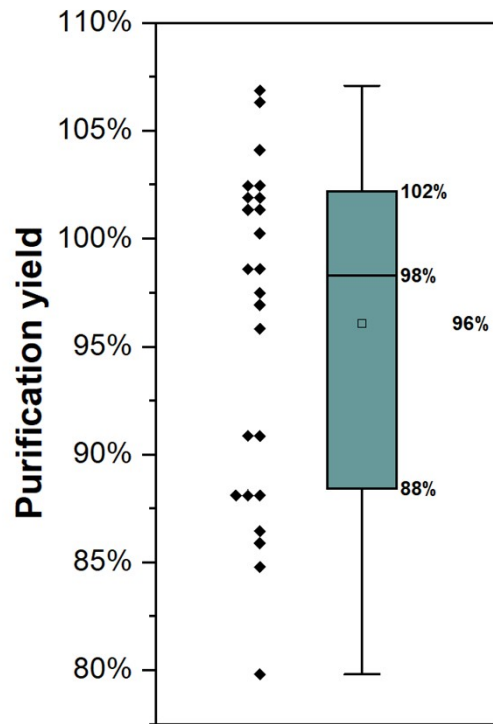

**Figure S4. Box plot of purification recovery distribution for dry-ashed standard samples**

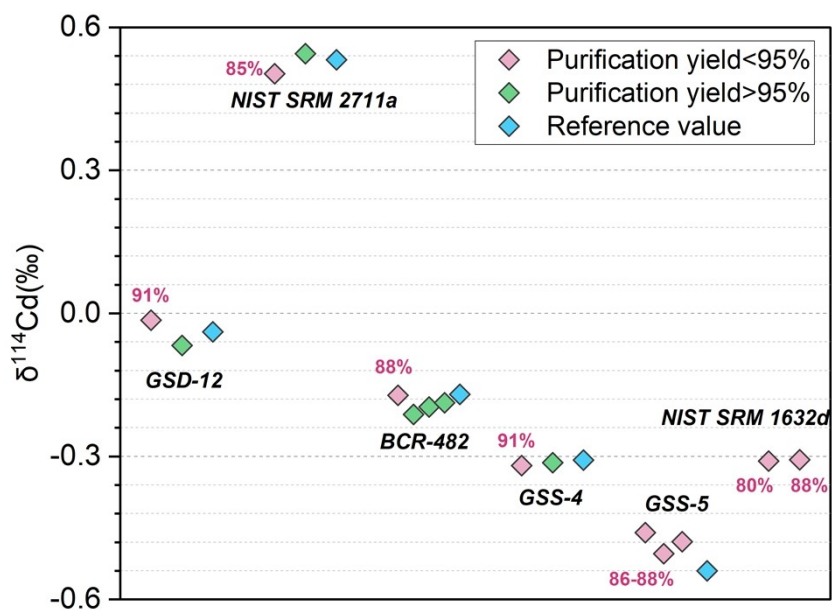

Figure S5. Comparison of Cd isotopic compositions of dry-ashed samples with different purification recovery ranges, reference values: GSS-5 from Peng *et al.* (2021)<sup>1</sup>; GSD-12 from Lu *et al.* (2021)<sup>2</sup>; NIST SRM 2711a and GSS-4 from Tan *et al.* (2020)<sup>3</sup>; BCR-482 from Borovička *et al.* (2020)<sup>4</sup>



**Table S1. The reference material information**

| Sample name          | Concentration<br>( $\mu\text{g g}^{-1}$ ) | Sample description                                                                            |
|----------------------|-------------------------------------------|-----------------------------------------------------------------------------------------------|
| NIST SRM<br>2711a    | $54.1 \pm 0.5$                            | Montana II Soil                                                                               |
| GSS-<br>4(GBW07404)  | $0.35 \pm 0.08$                           | Limestone weathered soil in Yishan, Guangxi<br>Province, China                                |
| GSS-<br>5(GBW07405)  | $0.45 \pm 0.09$                           | Yellow-red soil in Qibaoshan skarn copper<br>polymetallic ore district, Hunan Province, China |
| GSD-<br>11(GBW07311) | $2.3 \pm 0.2$                             | River sediment from Shizhuyuan polymetallic<br>mining area, Hunan Province, China             |
| GSD-<br>12(GBW07312) | $4.0 \pm 0.3$                             | River sediment from Yangchun polymetallic<br>mining area in Guangdong Province, China         |
| BCR-482              | $0.50 \pm 0.02^*$                         | Lichen                                                                                        |
| GSB-<br>16(GBW10025) | $0.37 \pm 0.03$                           | Spirulina platensis                                                                           |
| GSB-<br>29(GBW10051) | $1.00 \pm 0.02$                           | Pork liver                                                                                    |
| NIST SRM<br>1632d    | $0.08 \pm 0.01$                           | Bituminous Coal                                                                               |

\*This value is obtained from long-term observations in this study and is consistent with Klos *et al.*(2012)<sup>5</sup>.

**Table S2. Trace elements in QMA filter membranes and sediments**

| Sample       | Units               | Ga     | Zr      | Mo      | Cd (ICP-MS) | Cd (GF-AAS) |
|--------------|---------------------|--------|---------|---------|-------------|-------------|
| QMA Fliter-1 | ng dm <sup>-2</sup> | 185.9  | 7612.0  | 38497.1 | 44.6        | 2.1         |
| QMA Fliter-2 | ng dm <sup>-2</sup> | 187.6  | 7608.2  | 38574.7 | 42.3        | 1.6         |
| QMA Fliter-3 | ng dm <sup>-2</sup> | 219.4  | 9301.9  | 45567.3 | 52.6        | 3.3         |
| NSS-1        | µg g <sup>-1</sup>  | 7.531  | 127.361 | 0.145   | 0.111       | 0.003       |
| NSS-2        | µg g <sup>-1</sup>  | 23.703 | 411.712 | 1.045   | 0.356       | 0.023       |
| NSS-3        | µg g <sup>-1</sup>  | 17.766 | 655.734 | 0.562   | 0.575       | 0.047       |
| NSS-4        | µg g <sup>-1</sup>  | 24.524 | 193.485 | 0.940   | 0.234       | 0.068       |
| NSS-5        | µg g <sup>-1</sup>  | 26.032 | 172.931 | 1.349   | 0.154       | 0.029       |
| NSS-7        | µg g <sup>-1</sup>  | 10.902 | 143.761 | 0.556   | 0.138       | 0.011       |
| NSS-8        | µg g <sup>-1</sup>  | 30.276 | 165.820 | 1.988   | 0.359       | 0.233       |
| NSS-9        | µg g <sup>-1</sup>  | 2.254  | 43.606  | 0.211   | 0.038       | 0.003       |
| NSS-10       | µg g <sup>-1</sup>  | 20.114 | 237.393 | 0.676   | 0.247       | 0.040       |
| NSS-11       | µg g <sup>-1</sup>  | 24.460 | 430.924 | 0.901   | 0.367       | 0.030       |
| NSS-12       | µg g <sup>-1</sup>  | 18.165 | 981.180 | 0.374   | 0.827       | 0.022       |
| NSS-13       | µg g <sup>-1</sup>  | 23.920 | 492.757 | 0.776   | 0.440       | 0.073       |
| NSS-14       | µg g <sup>-1</sup>  | 12.219 | 131.791 | 0.326   | 0.111       | 0.020       |
| NSS-15       | µg g <sup>-1</sup>  | 14.182 | 403.767 | 0.381   | 0.325       | 0.003       |
| NSS-16       | µg g <sup>-1</sup>  | 14.308 | 192.838 | 0.472   | 0.168       | 0.009       |
| NSS-17       | µg g <sup>-1</sup>  | 11.395 | 476.474 | 0.247   | 0.376       | 0.003       |
| NSS-18       | µg g <sup>-1</sup>  | 7.366  | 154.942 | 0.337   | 0.159       | 0.072       |
| NSS-19       | µg g <sup>-1</sup>  | 1.875  | 31.189  | 0.129   | 0.034       | 0.003       |
| NSS-20       | µg g <sup>-1</sup>  | 1.677  | 59.854  | 0.192   | 0.055       | 0.003       |
| NSS-21       | µg g <sup>-1</sup>  | 17.346 | 217.790 | 0.730   | 0.234       | 0.051       |
| NSS-22       | µg g <sup>-1</sup>  | 18.501 | 405.464 | 0.872   | 0.401       | 0.073       |
| NSS-23       | µg g <sup>-1</sup>  | 18.687 | 305.560 | 0.848   | 0.310       | 0.068       |
| NSS-24       | µg g <sup>-1</sup>  | 27.180 | 222.157 | 1.424   | 0.288       | 0.099       |
| NSS-25       | µg g <sup>-1</sup>  | 29.441 | 175.265 | 1.190   | 0.260       | 0.136       |
| NSS-26       | µg g <sup>-1</sup>  | 25.928 | 241.537 | 1.034   | 0.629       | 0.497       |
| NSS-27       | µg g <sup>-1</sup>  | 23.911 | 288.346 | 1.302   | 0.622       | 0.401       |
| NSS-28       | µg g <sup>-1</sup>  | 25.443 | 230.995 | 0.862   | 0.517       | 0.334       |
| NSS-29       | µg g <sup>-1</sup>  | 23.380 | 212.328 | 0.703   | 0.205       | 0.027       |
| NSS-30       | µg g <sup>-1</sup>  | 24.925 | 242.475 | 1.070   | 0.333       | 0.153       |
| NSS-31       | µg g <sup>-1</sup>  | 25.486 | 203.949 | 0.834   | 0.187       | 0.044       |
| NSS-32       | µg g <sup>-1</sup>  | 27.947 | 241.632 | 0.985   | 0.511       | 0.324       |
| NSS-33       | µg g <sup>-1</sup>  | 26.483 | 189.939 | 1.234   | 0.553       | 0.377       |
| NSS-34       | µg g <sup>-1</sup>  | 26.526 | 236.736 | 1.081   | 0.787       | 0.577       |

|        |                      |        |         |       |       |       |
|--------|----------------------|--------|---------|-------|-------|-------|
| NSS-35 | $\mu\text{g g}^{-1}$ | 27.760 | 226.018 | 1.130 | 0.628 | 0.458 |
| NSS-36 | $\mu\text{g g}^{-1}$ | 24.660 | 360.644 | 1.026 | 0.558 | 0.247 |
| NSS-37 | $\mu\text{g g}^{-1}$ | 35.862 | 171.136 | 1.835 | 0.822 | 0.725 |
| NSS-38 | $\mu\text{g g}^{-1}$ | 30.223 | 402.882 | 2.176 | 0.804 | 0.452 |
| NSS-39 | $\mu\text{g g}^{-1}$ | 33.786 | 249.750 | 2.911 | 1.422 | 1.172 |
| NSS-41 | $\mu\text{g g}^{-1}$ | 26.454 | 337.488 | 1.102 | 0.646 | 0.237 |
| NSS-40 | $\mu\text{g g}^{-1}$ | 18.338 | 873.562 | 0.579 | 0.901 | 0.405 |
| NSS-42 | $\mu\text{g g}^{-1}$ | 22.158 | 253.617 | 1.221 | 0.844 | 0.577 |
| NSS-43 | $\mu\text{g g}^{-1}$ | 24.717 | 227.587 | 1.232 | 0.769 | 0.586 |
| NSS-44 | $\mu\text{g g}^{-1}$ | 21.627 | 415.018 | 0.990 | 1.628 | 1.313 |
| NSS-45 | $\mu\text{g g}^{-1}$ | 27.880 | 236.151 | 1.124 | 0.272 | 0.086 |
| NSS-46 | $\mu\text{g g}^{-1}$ | 30.104 | 246.683 | 1.278 | 0.374 | 0.198 |
| NSS-47 | $\mu\text{g g}^{-1}$ | 21.587 | 289.177 | 1.103 | 1.407 | 1.198 |
| NSS-48 | $\mu\text{g g}^{-1}$ | 26.979 | 159.507 | 1.485 | 0.187 | 0.050 |
| NSS-49 | $\mu\text{g g}^{-1}$ | 26.453 | 177.993 | 1.230 | 0.182 | 0.046 |
| NSS-50 | $\mu\text{g g}^{-1}$ | 22.670 | 279.542 | 1.079 | 0.275 | 0.062 |
| NSS-51 | $\mu\text{g g}^{-1}$ | 27.625 | 172.854 | 1.334 | 0.161 | 0.024 |
| NSS-52 | $\mu\text{g g}^{-1}$ | 28.716 | 132.789 | 1.492 | 0.302 | 0.191 |
| NSS-53 | $\mu\text{g g}^{-1}$ | 24.022 | 153.957 | 2.093 | 0.177 | 0.059 |
| NSS-54 | $\mu\text{g g}^{-1}$ | 21.582 | 240.518 | 1.626 | 0.331 | 0.155 |
| NSS-55 | $\mu\text{g g}^{-1}$ | 12.966 | 318.590 | 0.533 | 0.273 | 0.024 |
| NSS-56 | $\mu\text{g g}^{-1}$ | 19.484 | 197.278 | 0.859 | 0.181 | 0.022 |

---

## ***References***

- 1 H. Peng, D. He, R. Guo, X. Liu, N. S. Belshaw, H. Zheng, S. Hu and Z. Zhu, *J. Anal. At. Spectrom.*, 2021, **36**, 390–398.
- 2 Z. Lu, J.-M. Zhu, D. Tan, X. Wang and Z. Zheng, *Geostandards and Geoanalytical Research*, 2021, **45**, 565–581.
- 3 D. Tan, J.-M. Zhu, X. Wang, G. Han, Z. Lu and W. Xu, *J. Anal. At. Spectrom.*, 2020, **35**, 713–727.
- 4 J. Borovička, L. Ackerman and J. Rejšek, *Talanta*, 2021, **221**, 121389.
- 5 A. Kłos, M. Czora, M. Rajfur and M. Waclawek, *Water Air Soil Pollut*, 2012, **223**, 1829–1836.
